# Supplementary material for: DNMT3A mutations mediate the epigenetic reactivation of the leukemogenic factor MEIS1 in acute myeloid leukemia
Source: PubMed Central journal article supplement (PMC4705435; doi:10.1038/onc.2015.359), 2015-10-05
Supplement: NIHMS64719-supplement-TableS1.pdf [file NIHMS64719-supplement-TableS1.pdf]

**Table S1:** List of hypomethylated differentially expressed genes (OCI-AML3 vs AML5).

| Gene symbol | Gene Expression |       |                    | DNA methylation |
|-------------|-----------------|-------|--------------------|-----------------|
|             | OCI-AML3        | AML5  | Fold change (log2) | AML3-AML5       |
| AARS        | 10.00           | 7.69  | 2.32               | -0.30           |
| ABCB4       | 5.82            | 3.14  | 2.67               | -0.45           |
| ACAP1       | 4.77            | 3.40  | 1.37               | -0.48           |
| ACTN1       | 8.73            | 7.41  | 1.32               | -0.20           |
| ADAMTS5     | 5.52            | 2.94  | 2.58               | -0.36           |
| ADCK4       | 4.52            | 3.80  | 0.72               | -0.24           |
| ADORA3      | 5.23            | 3.64  | 1.59               | -0.30           |
| ADRBK1      | 6.16            | 5.07  | 1.10               | -0.34           |
| AFF3        | 6.17            | 4.69  | 1.48               | -0.47           |
| ALDH2       | 6.86            | 3.06  | 3.80               | -0.49           |
| ALDH9A1     | 9.02            | 7.54  | 1.47               | -0.21           |
| AMN1        | 6.44            | 3.91  | 2.53               | -0.84           |
| ANKRD13D    | 6.85            | 5.01  | 1.84               | -0.32           |
| ANPEP       | 5.00            | 3.22  | 1.77               | -0.23           |
| ANXA2       | 7.89            | 5.32  | 2.57               | -0.24           |
| APOBR       | 6.44            | 4.97  | 1.47               | -0.38           |
| APOC1       | 7.64            | 4.23  | 3.41               | -0.25           |
| ARHGAP1     | 6.71            | 5.73  | 0.99               | -0.20           |
| ARHGAP22    | 3.86            | 2.76  | 1.10               | -0.38           |
| ARHGEF17    | 4.13            | 3.36  | 0.77               | -0.30           |
| ART3        | 6.19            | 2.95  | 3.24               | -0.29           |
| ASGR2       | 8.25            | 3.30  | 4.96               | -0.21           |
| ATF4        | 12.84           | 11.74 | 1.10               | -0.24           |
| ATF5        | 7.74            | 4.26  | 3.48               | -0.37           |
| ATM         | 7.24            | 5.22  | 2.02               | -0.47           |
| AZI2        | 8.57            | 6.95  | 1.62               | -0.24           |
| B3GNT2      | 8.93            | 6.96  | 1.97               | -0.26           |
| B3GNT8      | 4.41            | 2.93  | 1.47               | -0.35           |
| BAK1        | 4.88            | 3.57  | 1.32               | -0.24           |
| BCL2A1      | 5.71            | 2.69  | 3.03               | -0.28           |
| BEX1        | 11.94           | 3.42  | 8.52               | -0.41           |
| BHLHB9      | 4.38            | 3.71  | 0.67               | -0.39           |
| BMP2        | 8.97            | 3.15  | 5.82               | -0.26           |
| BRSK1       | 4.74            | 3.54  | 1.20               | -0.23           |
| BTF3L4      | 8.62            | 7.35  | 1.27               | -0.30           |
| C11orf48    | 3.80            | 3.14  | 0.65               | -0.28           |
| C19orf59    | 9.12            | 4.70  | 4.42               | -0.23           |
| C1orf162    | 9.43            | 4.29  | 5.14               | -0.32           |
| C22orf46    | 4.85            | 4.10  | 0.75               | -0.21           |
| C2orf69     | 8.43            | 7.82  | 0.62               | -0.34           |
| C9orf64     | 6.92            | 4.57  | 2.34               | -0.23           |
| C9orf85     | 8.48            | 6.26  | 2.22               | -0.51           |
| CABP4       | 5.42            | 3.54  | 1.88               | -0.42           |
| CACNA2D4    | 8.30            | 4.25  | 4.05               | -0.41           |
| CADM1       | 6.58            | 3.37  | 3.20               | -0.41           |

|         |       |       |      |       |
|---------|-------|-------|------|-------|
| CAMK1   | 5.55  | 3.03  | 2.53 | -0.49 |
| CANX    | 10.54 | 9.72  | 0.82 | -0.25 |
| CCDC28B | 6.01  | 4.14  | 1.87 | -0.23 |
| CCR1    | 7.48  | 3.91  | 3.57 | -0.39 |
| CD1D    | 10.30 | 5.94  | 4.36 | -0.21 |
| CD226   | 4.44  | 2.79  | 1.65 | -0.23 |
| CD320   | 5.87  | 3.52  | 2.35 | -0.58 |
| CD70    | 8.24  | 7.02  | 1.23 | -0.29 |
| CDA     | 5.09  | 3.11  | 1.98 | -0.37 |
| CDKN1B  | 7.84  | 7.17  | 0.67 | -0.27 |
| CDKN2B  | 3.60  | 2.97  | 0.63 | -0.90 |
| CECR6   | 9.56  | 3.58  | 5.98 | -0.28 |
| CENPH   | 8.93  | 7.80  | 1.13 | -0.21 |
| CFD     | 10.97 | 10.34 | 0.63 | -0.25 |
| CLSTN2  | 4.47  | 3.26  | 1.21 | -0.23 |
| CNBP    | 10.71 | 10.02 | 0.69 | -0.31 |
| COL15A1 | 6.05  | 3.55  | 2.50 | -0.29 |
| COPZ2   | 7.46  | 5.96  | 1.49 | -0.32 |
| CPNE8   | 7.72  | 5.06  | 2.66 | -0.22 |
| CRCP    | 6.70  | 5.67  | 1.03 | -0.24 |
| CRIM1   | 3.75  | 3.00  | 0.75 | -0.20 |
| CRK     | 6.41  | 5.79  | 0.62 | -0.21 |
| CTSG    | 12.92 | 9.25  | 3.67 | -0.66 |
| CYB5R2  | 4.72  | 3.17  | 1.55 | -0.67 |
| DENND2D | 7.41  | 5.05  | 2.36 | -0.26 |
| DHRS9   | 11.20 | 9.84  | 1.36 | -0.42 |
| DNAJC4  | 5.82  | 5.14  | 0.69 | -0.21 |
| DOK2    | 7.75  | 4.84  | 2.91 | -0.65 |
| DUSP12  | 9.47  | 7.93  | 1.54 | -0.25 |
| EDEM1   | 5.39  | 4.69  | 0.71 | -0.20 |
| EEF1A1  | 6.66  | 6.05  | 0.60 | -0.22 |
| EFEMP2  | 5.26  | 3.88  | 1.37 | -0.46 |
| EIF2A   | 11.09 | 10.46 | 0.62 | -0.35 |
| EIF3M   | 8.87  | 8.26  | 0.61 | -0.32 |
| ELANE   | 8.35  | 3.06  | 5.29 | -0.67 |
| EMR2    | 4.54  | 3.82  | 0.71 | -0.20 |
| F2RL3   | 4.58  | 3.82  | 0.76 | -0.30 |
| FASTK   | 6.20  | 5.51  | 0.70 | -0.22 |
| FCER1G  | 11.17 | 3.34  | 7.84 | -0.45 |
| FCRLB   | 4.44  | 3.06  | 1.37 | -0.22 |
| FEZ1    | 7.65  | 3.14  | 4.51 | -0.31 |
| FEZ2    | 9.74  | 8.08  | 1.65 | -0.37 |
| FSTL4   | 3.91  | 3.30  | 0.61 | -0.25 |
| FUT7    | 5.85  | 4.09  | 1.76 | -0.40 |
| GALM    | 6.69  | 3.30  | 3.39 | -0.46 |
| GGPS1   | 7.60  | 6.93  | 0.67 | -0.35 |
| GNG12   | 3.57  | 2.98  | 0.59 | -0.21 |
| GPSM3   | 5.99  | 4.28  | 1.71 | -0.25 |
| GRAMD4  | 5.89  | 5.11  | 0.78 | -0.31 |
| GRSF1   | 8.47  | 7.70  | 0.77 | -0.26 |

|           |       |       |      |       |
|-----------|-------|-------|------|-------|
| GSTT1     | 4.94  | 4.13  | 0.81 | -0.33 |
| GYG2      | 4.67  | 3.33  | 1.34 | -0.46 |
| HADHA     | 9.03  | 8.36  | 0.68 | -0.44 |
| HADHB     | 8.66  | 7.98  | 0.68 | -0.43 |
| HAL       | 7.58  | 5.35  | 2.22 | -0.51 |
| HENMT1    | 7.85  | 3.50  | 4.35 | -0.80 |
| HERPUD1   | 10.28 | 7.14  | 3.14 | -0.26 |
| HIVEP3    | 5.63  | 4.81  | 0.82 | -0.27 |
| HNMT      | 7.75  | 3.18  | 4.57 | -0.33 |
| HOXA11    | 8.78  | 2.99  | 5.79 | -0.25 |
| HOXA13    | 8.33  | 3.07  | 5.26 | -0.23 |
| HOXB2     | 6.70  | 3.03  | 3.67 | -0.31 |
| HS3ST4    | 4.33  | 2.92  | 1.41 | -0.41 |
| HSD17B8   | 6.67  | 3.75  | 2.92 | -0.37 |
| HYLS1     | 7.80  | 5.82  | 1.98 | -0.35 |
| ICAM3     | 7.16  | 5.35  | 1.81 | -0.39 |
| IFI16     | 9.57  | 5.12  | 4.44 | -0.21 |
| IGFBP3    | 4.65  | 3.10  | 1.55 | -0.25 |
| IL11RA    | 4.48  | 3.65  | 0.83 | -0.26 |
| IL31RA    | 4.53  | 3.39  | 1.14 | -0.24 |
| INPP4A    | 6.04  | 5.31  | 0.73 | -0.30 |
| IRF8      | 11.32 | 9.28  | 2.04 | -0.40 |
| IRX5      | 8.89  | 6.99  | 1.90 | -0.54 |
| ITGB2     | 11.35 | 10.55 | 0.80 | -0.23 |
| ITPKC     | 4.31  | 3.62  | 0.68 | -0.25 |
| KCTD11    | 4.33  | 3.69  | 0.64 | -0.48 |
| KDM2A     | 6.64  | 5.82  | 0.82 | -0.30 |
| KIAA0226L | 4.12  | 3.31  | 0.81 | -0.27 |
| KIAA0930  | 8.62  | 7.66  | 0.95 | -0.32 |
| KIF7      | 4.62  | 3.77  | 0.85 | -0.35 |
| KLF11     | 5.28  | 4.06  | 1.23 | -0.35 |
| KLF15     | 5.27  | 4.41  | 0.86 | -0.41 |
| KLF2      | 7.65  | 5.37  | 2.28 | -0.25 |
| LAMP5     | 9.68  | 6.35  | 3.33 | -0.24 |
| LAT2      | 9.73  | 8.69  | 1.04 | -0.24 |
| LDHC      | 6.58  | 3.02  | 3.56 | -0.62 |
| LLGL2     | 5.14  | 4.43  | 0.71 | -0.42 |
| LPCAT1    | 10.19 | 8.05  | 2.13 | -0.29 |
| LPHN2     | 4.68  | 3.03  | 1.65 | -0.23 |
| LPPR3     | 6.36  | 5.23  | 1.13 | -0.39 |
| LRRC58    | 9.50  | 8.83  | 0.67 | -0.24 |
| LTBP3     | 3.96  | 3.31  | 0.64 | -0.26 |
| LTBR      | 7.49  | 3.60  | 3.89 | -0.48 |
| LXN       | 5.04  | 4.11  | 0.93 | -0.36 |
| MACROD1   | 5.25  | 4.45  | 0.79 | -0.31 |
| MAD1L1    | 8.54  | 5.96  | 2.58 | -0.21 |
| MAP1LC3A  | 5.46  | 2.95  | 2.51 | -0.49 |
| MBNL1     | 8.80  | 8.16  | 0.64 | -0.23 |
| MCOLN2    | 6.09  | 3.57  | 2.52 | -0.29 |
| MDM4      | 7.48  | 6.35  | 1.13 | -0.22 |

|         |       |      |      |       |
|---------|-------|------|------|-------|
| MEIS1   | 5.63  | 3.44 | 2.19 | -0.43 |
| METTL8  | 8.33  | 7.61 | 0.71 | -0.29 |
| MGA     | 6.61  | 5.87 | 0.73 | -0.60 |
| MKX     | 9.76  | 2.91 | 6.85 | -0.32 |
| MLST8   | 8.35  | 5.34 | 3.01 | -0.20 |
| MLXIPL  | 5.69  | 4.42 | 1.27 | -0.32 |
| MMP14   | 7.32  | 4.79 | 2.52 | -0.32 |
| MMP2    | 4.52  | 3.38 | 1.14 | -0.39 |
| MNDA    | 11.22 | 9.38 | 1.85 | -0.21 |
| MS4A3   | 11.55 | 9.76 | 1.79 | -0.33 |
| MSN     | 11.01 | 9.85 | 1.17 | -0.50 |
| MST1    | 5.21  | 4.05 | 1.16 | -0.26 |
| MX2     | 7.04  | 6.23 | 0.81 | -0.34 |
| NAA38   | 8.52  | 5.89 | 2.63 | -0.25 |
| NAP1L5  | 5.95  | 2.67 | 3.27 | -0.26 |
| NAPG    | 6.95  | 5.68 | 1.28 | -0.20 |
| NCF4    | 10.82 | 9.34 | 1.48 | -0.24 |
| NEFH    | 5.59  | 2.91 | 2.68 | -0.23 |
| NEK8    | 5.56  | 4.20 | 1.36 | -0.21 |
| NFKBIL1 | 7.04  | 4.40 | 2.65 | -0.35 |
| NLRP3   | 8.31  | 7.59 | 0.72 | -0.23 |
| NME3    | 8.66  | 7.40 | 1.26 | -0.26 |
| NOLC1   | 7.93  | 7.32 | 0.61 | -0.28 |
| NPY1R   | 5.06  | 3.29 | 1.77 | -0.30 |
| NR1H3   | 4.64  | 4.00 | 0.64 | -0.33 |
| NRG4    | 7.30  | 3.33 | 3.97 | -0.23 |
| NT5E    | 5.81  | 3.16 | 2.65 | -0.58 |
| NT5M    | 7.31  | 5.94 | 1.37 | -0.31 |
| NUDT13  | 4.97  | 4.21 | 0.76 | -0.25 |
| NUMB    | 5.69  | 4.96 | 0.73 | -0.23 |
| NXF3    | 6.92  | 3.25 | 3.67 | -0.26 |
| ONECUT2 | 9.00  | 4.99 | 4.01 | -0.23 |
| OSBPL11 | 7.73  | 5.94 | 1.79 | -0.33 |
| OSBPL5  | 5.11  | 3.63 | 1.48 | -0.44 |
| P4HB    | 10.38 | 8.78 | 1.60 | -0.31 |
| PCM1    | 7.41  | 6.00 | 1.41 | -0.31 |
| PDGFRL  | 4.18  | 3.40 | 0.78 | -0.41 |
| PGBD5   | 4.04  | 3.36 | 0.68 | -0.20 |
| PID1    | 6.41  | 3.63 | 2.78 | -0.21 |
| PIGU    | 7.56  | 6.20 | 1.36 | -0.27 |
| PIK3AP1 | 8.56  | 7.73 | 0.83 | -0.24 |
| PLD3    | 4.98  | 3.05 | 1.93 | -0.23 |
| PLD6    | 7.02  | 4.19 | 2.83 | -0.20 |
| PLEC    | 4.90  | 4.12 | 0.78 | -0.46 |
| PPAPDC3 | 4.51  | 3.36 | 1.15 | -0.34 |
| PPIL3   | 10.40 | 8.88 | 1.52 | -0.25 |
| PPP4R2  | 7.82  | 7.02 | 0.80 | -0.22 |
| PRKCDBP | 6.50  | 3.46 | 3.03 | -0.77 |
| PROCA1  | 4.71  | 3.23 | 1.49 | -0.22 |
| PSD4    | 4.68  | 3.73 | 0.96 | -0.23 |

|          |       |      |      |       |
|----------|-------|------|------|-------|
| PSMD12   | 8.68  | 8.04 | 0.64 | -0.22 |
| PTCD2    | 4.16  | 3.14 | 1.02 | -0.26 |
| PTGER3   | 4.11  | 3.15 | 0.96 | -0.31 |
| PTPN7    | 7.33  | 6.00 | 1.33 | -0.22 |
| RAB5A    | 7.27  | 6.50 | 0.77 | -0.27 |
| RAC1     | 9.48  | 8.82 | 0.66 | -0.26 |
| RBBP9    | 6.74  | 5.22 | 1.52 | -0.24 |
| RBM38    | 7.76  | 6.47 | 1.29 | -0.33 |
| RBM47    | 5.65  | 3.40 | 2.25 | -0.25 |
| RFX7     | 5.15  | 4.50 | 0.65 | -0.20 |
| RINL     | 5.78  | 3.65 | 2.14 | -0.37 |
| RNASE6   | 10.46 | 3.98 | 6.48 | -0.33 |
| RNF114   | 7.96  | 7.25 | 0.71 | -0.23 |
| RNF157   | 4.31  | 3.59 | 0.71 | -0.22 |
| ROGDI    | 6.21  | 3.64 | 2.57 | -0.21 |
| RPGRIP1  | 3.76  | 3.14 | 0.62 | -0.26 |
| RPL36    | 7.04  | 6.39 | 0.65 | -0.22 |
| RPL39L   | 7.04  | 3.41 | 3.63 | -0.20 |
| RPL7L1   | 8.97  | 8.26 | 0.71 | -0.25 |
| RPS18    | 5.37  | 4.39 | 0.97 | -0.37 |
| RRAS     | 5.01  | 3.72 | 1.29 | -0.23 |
| RUSC1    | 5.24  | 4.30 | 0.94 | -0.27 |
| RXRA     | 7.61  | 6.73 | 0.88 | -0.32 |
| S100A11  | 10.36 | 7.21 | 3.15 | -0.49 |
| S100A13  | 5.45  | 4.03 | 1.41 | -0.36 |
| SAMHD1   | 7.77  | 4.61 | 3.16 | -0.22 |
| SCPEP1   | 8.62  | 7.48 | 1.14 | -0.22 |
| SEC23B   | 9.50  | 8.48 | 1.02 | -0.29 |
| SERPINH1 | 6.88  | 4.05 | 2.83 | -0.23 |
| SETDB1   | 6.76  | 6.13 | 0.63 | -0.31 |
| SFMBT2   | 6.28  | 3.74 | 2.54 | -0.63 |
| SGTB     | 6.39  | 4.47 | 1.92 | -0.38 |
| SIKE1    | 7.23  | 5.94 | 1.29 | -0.25 |
| SKA2     | 7.46  | 6.01 | 1.46 | -0.29 |
| SLC35D2  | 5.97  | 3.77 | 2.20 | -0.62 |
| SLC36A4  | 8.11  | 7.14 | 0.98 | -0.23 |
| SLC3A2   | 9.26  | 6.46 | 2.81 | -0.24 |
| SLC9A3   | 3.65  | 3.02 | 0.63 | -0.20 |
| SLFN12   | 4.74  | 2.64 | 2.10 | -0.62 |
| SOWAHC   | 7.16  | 3.28 | 3.88 | -0.26 |
| SP110    | 6.48  | 5.54 | 0.94 | -0.23 |
| SPAG9    | 5.63  | 4.86 | 0.77 | -0.20 |
| SPATC1L  | 5.41  | 4.62 | 0.79 | -0.22 |
| SPTLC2   | 9.01  | 7.12 | 1.89 | -0.22 |
| SRM      | 9.30  | 8.59 | 0.72 | -0.20 |
| STX12    | 7.20  | 6.44 | 0.77 | -0.35 |
| SUSD3    | 5.33  | 3.02 | 2.30 | -0.46 |
| SYAP1    | 6.96  | 6.06 | 0.91 | -0.30 |
| TAF6     | 4.12  | 3.52 | 0.59 | -0.25 |
| TARS     | 11.70 | 9.76 | 1.95 | -0.21 |

|          |       |       |      |       |
|----------|-------|-------|------|-------|
| TCIRG1   | 7.85  | 4.79  | 3.05 | -0.30 |
| TGFB1I1  | 4.72  | 3.89  | 0.83 | -0.27 |
| TLE3     | 6.36  | 4.71  | 1.65 | -0.28 |
| TLE6     | 4.79  | 3.25  | 1.54 | -0.23 |
| TMC6     | 4.66  | 3.72  | 0.94 | -0.39 |
| TMEM115  | 6.41  | 5.82  | 0.59 | -0.32 |
| TMEM128  | 7.50  | 6.38  | 1.12 | -0.40 |
| TMEM138  | 5.51  | 4.60  | 0.91 | -0.26 |
| TMEM167A | 10.82 | 9.76  | 1.06 | -0.32 |
| TMEM209  | 7.32  | 5.79  | 1.52 | -0.22 |
| TMEM41B  | 6.43  | 5.51  | 0.92 | -0.47 |
| TMEM47   | 6.35  | 3.26  | 3.09 | -0.33 |
| TNF      | 7.28  | 3.35  | 3.93 | -0.49 |
| TOMM20   | 9.29  | 8.23  | 1.06 | -0.28 |
| TOX2     | 4.06  | 3.32  | 0.74 | -0.22 |
| TRIB2    | 8.37  | 3.34  | 5.03 | -0.21 |
| TRIP13   | 8.32  | 7.64  | 0.69 | -0.22 |
| TRIP6    | 9.17  | 4.29  | 4.87 | -0.61 |
| TRIT1    | 6.49  | 5.43  | 1.07 | -0.20 |
| TRPM2    | 5.79  | 4.47  | 1.32 | -0.45 |
| TSEN54   | 7.20  | 6.42  | 0.78 | -0.25 |
| TTC38    | 4.78  | 3.98  | 0.81 | -0.26 |
| TUBG2    | 6.27  | 4.48  | 1.79 | -0.22 |
| UBE2C    | 9.98  | 9.32  | 0.66 | -0.33 |
| UBE2M    | 9.27  | 8.44  | 0.83 | -0.21 |
| UBE2Z    | 7.37  | 6.48  | 0.89 | -0.23 |
| UGGT1    | 5.99  | 5.22  | 0.77 | -0.27 |
| UNC13D   | 4.92  | 3.88  | 1.04 | -0.22 |
| USP4     | 10.15 | 9.56  | 0.59 | -0.26 |
| VIT      | 7.23  | 3.34  | 3.89 | -0.42 |
| VKORC1L1 | 6.04  | 5.30  | 0.74 | -0.24 |
| VLDLR    | 7.71  | 4.12  | 3.59 | -0.21 |
| VPS4B    | 5.81  | 5.19  | 0.62 | -0.21 |
| WDR54    | 8.53  | 7.19  | 1.34 | -0.24 |
| WDR55    | 6.58  | 5.62  | 0.96 | -0.27 |
| XPOT     | 11.19 | 10.24 | 0.95 | -0.21 |
| YDJC     | 9.52  | 8.40  | 1.12 | -0.29 |
| YPEL3    | 7.14  | 4.08  | 3.06 | -0.44 |
| ZNF133   | 6.60  | 5.33  | 1.27 | -0.22 |
| ZNF331   | 6.98  | 4.92  | 2.06 | -0.38 |
| ZNF439   | 3.82  | 2.61  | 1.21 | -0.41 |
| ZNF451   | 5.67  | 4.99  | 0.68 | -0.23 |
| ZNF513   | 5.36  | 4.49  | 0.87 | -0.22 |
| ZNF532   | 5.47  | 3.65  | 1.82 | -0.26 |
| ZNF562   | 4.38  | 3.59  | 0.79 | -0.24 |
| ZNHIT1   | 9.57  | 8.85  | 0.72 | -0.20 |
| ZXDC     | 5.52  | 4.89  | 0.63 | -0.23 |
