# Supplementary material for: DNMT3A mutations mediate the epigenetic reactivation of the leukemogenic factor MEIS1 in acute myeloid leukemia
Source: PubMed Central journal article supplement (PMC4705435; doi:10.1038/onc.2015.359), 2015-10-05
Supplement: NIHMS64719-supplement-TableS3.pdf [file NIHMS64719-supplement-TableS3.pdf]

**Table S3:** Differentially methylated genes in 68 AML patients (Wilcoxon test,  $p < 0.01$ ).

| Gene symbol | DMR size (bp) | Expression fold change (log2) | CpG ID                                                                                         | # probes (450K) | Genomic location        |
|-------------|---------------|-------------------------------|------------------------------------------------------------------------------------------------|-----------------|-------------------------|
| MEIS1       | 6926          | 2.19                          | cg05877497, cg22731271, cg26537478, cg01271812, cg08238215                                     | 5               | chr2:66667059-66673985  |
| HOXA11      | 3147          | 5.79                          | cg00418216, cg20994254, cg24446586, cg05311410, cg12997720, cg26857670, cg13352750, cg17950095 | 8               | chr7:27224700-27227847  |
| IRF8        | 186           | 2.04                          | cg16705546, cg04599946                                                                         | 2               | chr16:85936480-85936666 |
| HOXB2       | 90            | 3.67                          | cg01882880, cg21097733, cg17573933                                                             | 3               | chr17:46623729-46623819 |
| NRG4        | 69            | 3.97                          | cg00438616, cg00371829, cg22211154                                                             | 3               | chr15:76304796-76304865 |
| ADAMTS5     | 1             | 2.58                          | cg02462195                                                                                     | 1               | chr21:28340304          |
| KLF2        | 1             | 2.28                          | cg05906166                                                                                     | 1               | chr19:16437057          |
| CADM1       | 1             | 3.20                          | cg10193817                                                                                     | 1               | chr11:115375226         |
| PRKCDBP     | 1             | 3.03                          | cg16776065                                                                                     | 1               | chr11:6340486           |
| TRIP6       | 1             | 4.87                          | cg21406967                                                                                     | 1               | chr7:100464553          |
| RNASE6      | 1             | 6.48                          | cg23595621                                                                                     | 1               | chr14:21250201          |
| PLD6        | 1             | 2.83                          | cg26043529                                                                                     | 1               | chr17:17106266          |
