# Supplementary material for: DNMT3A mutations mediate the epigenetic reactivation of the leukemogenic factor MEIS1 in acute myeloid leukemia
Source: Oncogene. 2015 Oct 5;35(23):3079–82. doi: 10.1038/onc.2015.359 (PMC4705435; doi:10.1038/onc.2015.359)
Supplement: Supplementary Table 2 [file onc2015359x3.pdf]

**Table S2.** Clinical characteristics of the studied AML patient cohort

| Characteristics        | DNMT3A mutational status |       |           |       |         |       |
|------------------------|--------------------------|-------|-----------|-------|---------|-------|
|                        | N                        | %     | Wild-type |       | Mutated |       |
|                        |                          |       | N         | %     | N       | %     |
| <b>Gender</b>          |                          |       |           |       |         |       |
| Male                   | 32                       | 47.1% | 26        | 81.3% | 6       | 18.7% |
| Female                 | 32                       | 47.1% | 24        | 75.0% | 8       | 25.0% |
| Unknown                | 4                        | 5.8%  | 4         | 100%  | 0       | 0%    |
| <b>Age</b>             |                          |       |           |       |         |       |
| < 50                   | 19                       | 28.0% | 12        | 63.2% | 7       | 36.8% |
| > 50                   | 45                       | 66.2% | 38        | 84.4% | 7       | 15.6% |
| Unknown                | 4                        | 5.8%  | 4         | 100%  | 0       | 0%    |
| <b>Risk group</b>      |                          |       |           |       |         |       |
| Favorable              | 10                       | 14.7% | 10        | 100%  | 0       | 0%    |
| Intermediate           | 39                       | 57.3% | 26        | 66.7% | 13      | 33.3% |
| Adverse                | 8                        | 11.8% | 7         | 87.5% | 1       | 12.5% |
| Unknown                | 11                       | 16.2% | 11        | 100%  | 0       | 0%    |
| <b>Cytogenetics</b>    |                          |       |           |       |         |       |
| Normal                 | 31                       | 45.6% | 20        | 64.5% | 11      | 35.5% |
| Complex                | 4                        | 5.9%  | 3         | 75.0% | 1       | 25.0% |
| Others                 | 22                       | 32.3% | 20        | 90.9% | 2       | 9.1%  |
| Unknown                | 11                       | 16.2% | 11        | 100%  | 0       | 0%    |
| <b>FAB subtype</b>     |                          |       |           |       |         |       |
| M0 to M2               | 34                       | 50.0% | 27        | 79.4% | 7       | 20.6% |
| M3 to M4               | 24                       | 35.3% | 19        | 79.2% | 5       | 20.8% |
| M5 to M7               | 6                        | 8.9%  | 4         | 66.7% | 2       | 33.3% |
| Unknown                | 4                        | 5.8%  | 4         | 100%  | 0       | 0%    |
| <b>5-year Survival</b> |                          |       |           |       |         |       |
| Alive                  | 24                       | 35.3% | 21        | 87.5% | 3       | 12.5% |
| Exitus                 | 40                       | 58.9% | 29        | 72.5% | 11      | 27.5% |
| Unknown                | 4                        | 5.8%  | 4         | 100%  | 0       | 0%    |
